# Supplementary material for: Discovery of survival factor for primitive chronic myeloid leukemia cells using induced pluripotent stem cells
Source: PubMed Central journal article supplement (PMC5003778; doi:10.1016/j.scr.2015.10.015), 2015-10-31
Supplement: NIHMS810460-supplement-Figures.pdf [file NIHMS810460-supplement-Figures.pdf]

## Supplementary Figures

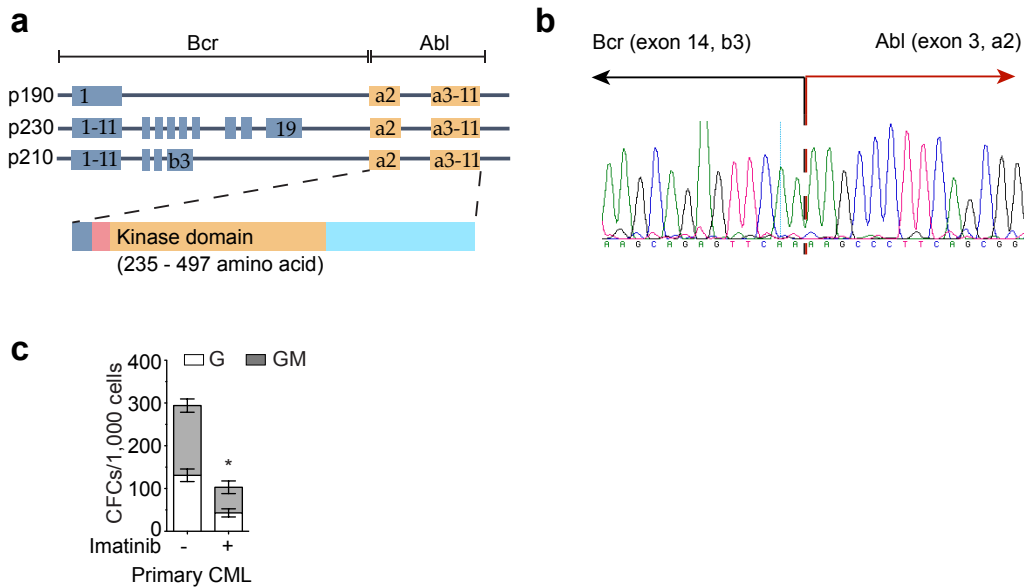

**Supplementary Figure S1. Characterization of BCR-ABL fusion in iPSCs and imatinib sensitivity of paternal CML bone marrow cells. (a)** Schematic diagram showing three different isoforms of the BCR-ABL protein. **(b)** CML iPSCs expressed the typical p210 isoform without mutation in the kinase domain (235 – 497 amino acid). Flow chromatogram depicts the site of translocation junction. **(c)** The effect of imatinib pretreatment on myeloid CFC potential of the parental  $\text{lin}^- \text{CD}34^+$  BM cells from CML patient used to generate iPSCs. Somatic  $\text{lin}^- \text{CD}34^+$  cells were incubated 24 hours in serum-free medium with low concentration of growth factors with or without 5  $\mu\text{M}$  imatinib and then transferred to CFC medium. Results are mean  $\pm$  SEM of three experiments. \*  $p < 0.05$ .

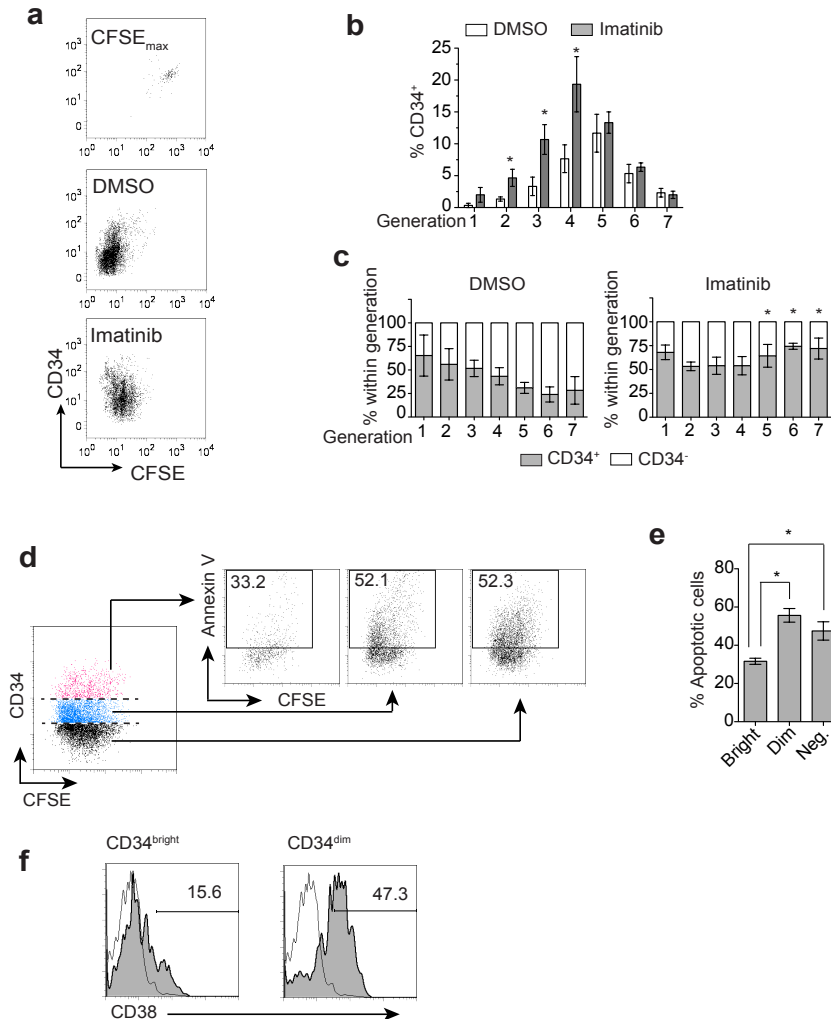

**Supplementary Figure S2. CFSE tracking of CML and BM iCD34<sup>+</sup> cells after treatment with imatinib.** (a) iCD34<sup>+</sup> cells were cultured with or without 5  $\mu$ M imatinib for four days. Mitomycin C-treated cells were used to set the CFSE<sub>max</sub>. Dot plot shows CD34 vs CFSE. (b) Histogram shows the percentage of viable CD34<sup>+</sup> cells from each generation in the total culture as determined by CFSE tracking. iCD34<sup>+</sup> cells were labeled with CFSE and cultured with growth factors with or without 5  $\mu$ M imatinib for four days. At the end of the culture period, cells were stained with CD34-APC and 7AAD for flow cytometry analysis. The percentage of cells in each generation was determined using FlowJo software. (c) The relative proportion of CD34<sup>+</sup> and CD34<sup>-</sup> cells within each generation in control and imatinib treated cultures. Bars show mean  $\pm$  SEM of three experiments. \* indicates significant difference ( $p < 0.05$ ) between imatinib treated and corresponding DMSO cultures. (d) Flow cytometric analysis of apoptosis (7AAD<sup>-</sup>Annexin V<sup>+</sup>) and CD34 expression at the end of 4 days expansion with 5  $\mu$ M imatinib. (e) Chart shows percentage of apoptotic cells within CD34<sup>bright</sup>, CD34<sup>dim</sup>, and CD34<sup>-</sup> (negative) populations gated from left dot plot. Results are mean  $\pm$  SEM of three experiments. \*  $p < 0.05$ . (f) CD38 expression by CD34<sup>bright</sup> and CD34<sup>dim</sup> cells.

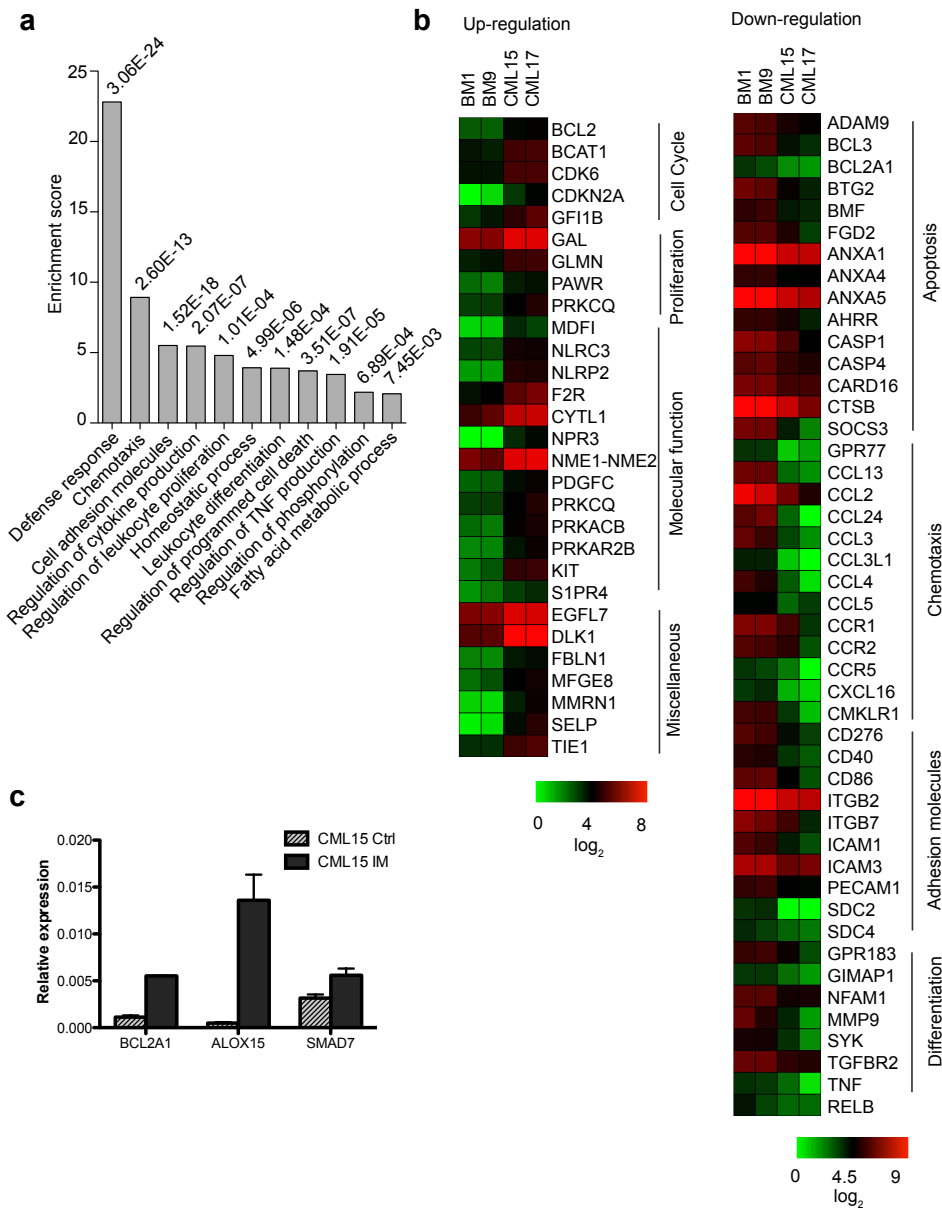

**Supplementary Figure S3. Molecular profile of BM and CML iCD34<sup>+</sup>.** (a) The 922 differentially expressed genes between CML and BM iCD34<sup>+</sup> cells showing  $\geq 2$  fold change were classified into biological processes as defined by the Gene Ontology (GO) Term using DAVID program. Representative clusters are shown in a histogram along with p-value. (b) Heat maps show selected up-regulated and down-regulated genes in CML iCD34<sup>+</sup> within identified GO categories. The gene expression levels are estimated in tpm. (c) qPCR analysis of BCL2A1, ALOX15 and SMAD7 expression in CML15 iCD34<sup>+</sup> cells.

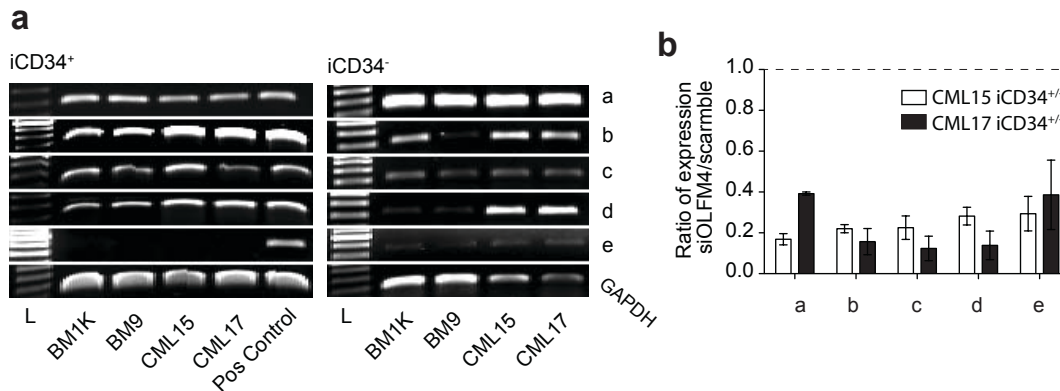

**Supplementary Figure S4. OLFM4 expression in iCD34<sup>+</sup> and iCD34<sup>-</sup> cells generated from CML and normal BM iPSCs and OLFM4 knockdown efficiency with siRNA. (a)** Expression of OLFM4 mRNA isoforms in control (BM) and CML iCD34<sup>+</sup> and iCD34<sup>-</sup> cells as determined by RT-PCR. L is DNA ladder. Positive control in left panel shows iCD34<sup>-</sup> cells. **(b)** qPCR analysis of the knockdown efficiency of OLFM4 mRNA isoforms in CML iPSC-derived hematopoietic cells (CML iCD34<sup>+/-</sup>) using OLFM4 siRNA (siOLFM4). Results are mean  $\pm$  SEM of 3 independent experiments in duplicate. The expression level was calculated relative to negative control (scramble siRNA) 24 hours after transduction.

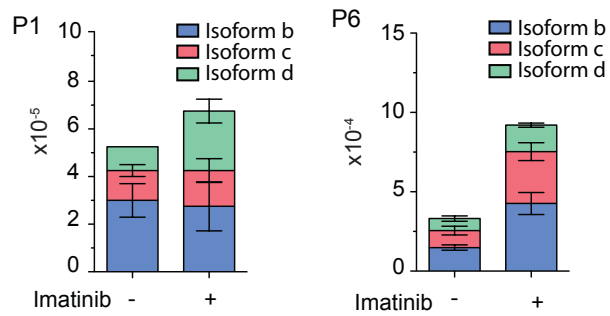

**Supplementary Figure S5. qPCR analysis of the expression of OLFM4b-OLFM4d mRNA isoforms in hematopoietic colonies from CML P1 and P6 patients.** sCD34<sup>+</sup> cells were pretreated with imatinib or DMSO (control) for 24 hour and placed into clonogenic medium. After 7 days of clonogenic culture colonies were collected and analyzed by RT-PCR.

**Supplementary Table S3. Absolute numbers of CFCs from LTC-IC cultures of sCD34+ cells treated with imatinib (IM) and siOLFM4.**

|               | Total number of CFCs per 1000 initial lin <sup>-</sup> CD34 <sup>+</sup> cells<br>(mean±SEM) |             |         |            |
|---------------|----------------------------------------------------------------------------------------------|-------------|---------|------------|
|               | Scramble                                                                                     | Scramble+IM | siOLFM4 | siOLFM4+IM |
| <b>CML P1</b> | 176±35                                                                                       | 136±38      | 31±17   | 68±28      |
| <b>CML P3</b> | 219±60                                                                                       | 193±45      | 57±27   | 57±35      |
| <b>CML P4</b> | 424±59                                                                                       | 405±110     | 261±39  | 237±35     |
| <b>CML P5</b> | 242±40                                                                                       | 236±34      | 88±27   | 72±27      |
| <b>CML P6</b> | 267±27                                                                                       | 220±39      | 64±20   | 41±18      |
| <b>NBM1</b>   | 228±42                                                                                       | 168±51      | 153±39  | 195±53     |
| <b>NBM2</b>   | 231±45                                                                                       | 185±72      | 232±26  | 174±38     |
| <b>NBM3</b>   | 308±34                                                                                       | 328±32      | 358±41  | 333±14     |

**Supplementary Table S4. Percentage of BCR-ABL positive colonies from LTC-IC cultures of sCD34+ cells treated with imatinib (IM) and siOLFM4.**

|               | Baseline | Scramble+IM | siOLFM4+IM |
|---------------|----------|-------------|------------|
| <b>CML P1</b> | 70       | 90          | 80         |
| <b>CML P6</b> | 90       | 80          | 60         |

**Supplementary Table S5. Primers used in the study**

| Gene     | Reference Sequence                          | Forward                   | Reverse                   | Product Size |
|----------|---------------------------------------------|---------------------------|---------------------------|--------------|
| hGAPDH   | NM_001256799.2                              | GTGGACCTGACCTGCCGTCT      | GGAGGAGTGGGTGTCGCTGT      | 153          |
| mGAPDH   | NM_001289726.1                              | AGACCACAGTCCATGCCA        | TTGCCACAGCCTTGGCA         | 137          |
| OLFM4a   | NCBI AceView<br>OLFM4; aAug10               | CCGTGGACAGAGTGAAC         | TCTACCTTGATCAGCTCGAA      | 202          |
| OLFM4b   | NCBI AceView<br>OLFM4; bAug10               | ACTTGAGGGTGGAGGGTGA       | ATTTTGCTTCAGCATCATCATTTGC | 217          |
| OLFM4c   | NCBI AceView<br>OLFM4; cAug10-<br>unspliced | ATAGTTCTTGCTGGTTTCATTATTC | TAATATCCTAAGCACCAAAGGAAT  | 214          |
| OLFM4d   | NCBI AceView<br>OLFM4; dAug10               | ACCTCCTGGGGCAGTTCA        | CACATCCCCAAATCCCCT        | 211          |
| OLFM4e   | NCBI AceView<br>OLFM4; eAug10               | ATGTATTGGACTCCACTTACTT    | CATGATGTCAATTCGGACAGT     | 254          |
| OLFM4a/b | NCBI AceView<br>OLFM4; aAug10<br>and bAug10 | CCAGCTGGAGGTGGAGATAAG     | TCAGAGCCACGATTCTCGG       | 103          |
| BCR/ABL  | Bcr/Abl<br>NM_004327.3<br>NM_005157.5       | ACGTTCTGATCTCCTCTGACTATG  | TCAGACCCTGAGGCTCAAAG      | 251          |

NCBI AceView

<http://www.ncbi.nlm.nih.gov/IEB/Research/Acembly/av.cgi?db=human&c=Gene&l=OLFM4>
